# Supplementary material
Source: PubMed Central journal article supplement (PMC3648870)
Supplement: NIHMS425493-supplement-2.pdf [file NIHMS425493-supplement-2.pdf]

**Supplementary Table S1. Microarray analysis of *M.tb. ΔsigI* mutant with wild-type (*ΔsigI/WT*).**

For each gene listed, the average signal (normalized by total signal intensity) from the *M.tb. ΔsigI* mutant transcripts was divided by the average signal from the wild-type transcripts, and this was determined at OD<sub>600</sub> of 1 (OD1) and OD<sub>600</sub> of 2 (OD2). A symbol in the “Q PCR” column indicates that transcription levels were validated by qRT-PCR. Q value represents the statistical significance of the expression ratio, determined with a false discovery rate of 1%.

| Rv No.  | Description                                                         | Gene             | OD1 |     | OD2 |     | Q PCR | (FDR 1%)<br>Q value |
|---------|---------------------------------------------------------------------|------------------|-----|-----|-----|-----|-------|---------------------|
|         |                                                                     |                  | Ave | SD  | Ave | SD  |       |                     |
| Rv3121  | Probable cytochrome P450 141 CYP141                                 | <i>cyp141</i>    | 0.0 | 0.6 | 0.6 | 0.1 |       | 0                   |
| Rv2351c | Probable membrane-associated phospholipase C 1 PlcA (MTP40 antigen) | <i>plcA</i>      | 0.0 | 0.3 | 0.5 | 0.1 |       | 0                   |
| Rv1840c | PE-PGRS family protein                                              | <i>PE_PGRS34</i> | 0.1 | 0.3 | 0.6 | 0.1 |       | 0                   |
| Rv1009  | Probable resuscitation-promoting factor RpfB                        | <i>rpfB</i>      | 0.2 | 1.2 | 0.5 | 0.1 |       | 0                   |
| Rv0440  | Chaperonin GroEL                                                    | <i>groEL</i>     | 0.2 | 0.0 | 0.2 | 0.0 |       | 0                   |
| Rv0350  | Molecular chaperone DnaK                                            | <i>dnaK</i>      | 0.2 | 0.0 | 0.3 | 0.0 |       | 0                   |
| Rv3417c | Chaperonin GroEL                                                    | <i>groEL</i>     | 0.3 | 0.1 | 0.5 | 0.1 |       | 0                   |
| Rv2276  | Cytochrome P450 121 CYP121                                          | <i>cyp121</i>    | 0.3 | 0.2 | 0.6 | 0.1 |       | 0                   |
| Rv2800  | Possible hydrolase                                                  |                  | 0.3 | 0.2 | 0.6 | 0.1 |       | 0                   |
| Rv1304  | ATP synthase subunit A                                              | <i>atpB</i>      | 0.3 | 0.0 | 0.6 | 0.0 |       | 0                   |
| Rv3074  | Hypothetical protein                                                |                  | 0.3 | 0.1 | 0.5 | 0.1 |       | 0                   |
| Rv1307  | Probable ATP synthase delta chain AtpH                              | <i>atpH</i>      | 0.3 | 0.0 | 0.5 | 0.0 |       | 0                   |
| Rv2193  | Probable cytochrome C oxidase (subunit III) CtaE                    | <i>ctaE</i>      | 0.3 | 0.0 | 0.4 | 0.0 | X     | 0                   |
| Rv1310  | ATP synthase subunit B                                              | <i>atpD</i>      | 0.3 | 0.0 | 0.5 | 0.0 |       | 0                   |
| Rv3841  | Possible bacterioferritin BfrB                                      | <i>bfrB</i>      | 0.3 | 0.0 | 0.6 | 0.1 |       | 0                   |
| Rv1308  | ATP synthase subunit A                                              | <i>atpA</i>      | 0.3 | 0.0 | 0.4 | 0.0 |       | 0                   |
| Rv1309  | ATP synthase subunit C                                              | <i>atpG</i>      | 0.3 | 0.0 | 0.5 | 0.0 |       | 0                   |
| Rv1658  | Argininosuccinate synthase                                          | <i>argG</i>      | 0.3 | 0.1 | 0.5 | 0.1 |       | 0                   |
| Rv3418c | Co-chaperonin GroES                                                 | <i>groES</i>     | 0.3 | 0.0 | 0.2 | 0.0 |       | 0                   |
| Rv0528  | Probable conserved transmembrane protein                            |                  | 0.3 | 0.1 | 0.6 | 0.0 |       | 0                   |
| Rv2845c | Prolyl-tRNA synthetase                                              | <i>proS</i>      | 0.4 | 0.1 | 0.5 | 0.1 |       | 0                   |
| Rv1253  | Probable cold-shock DeaD-box protein A homolog DeaD                 | <i>deaD</i>      | 0.4 | 0.3 | 0.6 | 0.1 | X     | 0                   |
| Rv2463  | Probable esterase/lipase LipP                                       | <i>lipP</i>      | 0.4 | 0.2 | 0.6 | 0.0 |       | 0                   |
| Rv2992c | Glutamyl-tRNA synthetase                                            | <i>gltX</i>      | 0.4 | 0.1 | 0.6 | 0.0 |       | 0                   |
| Rv1305  | ATP synthase subunit C                                              | <i>atpE</i>      | 0.4 | 0.0 | 0.5 | 0.0 |       | 0                   |
| Rv1908c | Catalase-peroxidase-peroxynitritase T KatG                          | <i>katG</i>      | 0.4 | 0.0 | 0.4 | 0.0 | X     | 0                   |
| Rv3446c | Hypothetical alanine and valine rich protein                        |                  | 0.4 | 0.7 | 0.6 | 0.1 |       | 0                   |
| Rv1765c | Hypothetical protein                                                |                  | 0.4 | 0.4 | 0.1 | 1.9 |       | 0                   |
| Rv2184c | Hypothetical protein                                                |                  | 0.4 | 0.3 | 0.6 | 0.1 |       | 0                   |
| Rv2357c | Glycyl-tRNA synthetase                                              | <i>glyS</i>      | 0.4 | 0.1 | 0.5 | 0.4 |       | 0                   |
| Rv0826  | Hypothetical protein                                                |                  | 0.4 | 0.0 | 0.5 | 0.0 | X     | 0                   |
| Rv0352  | Probable chaperone protein DnaJ1                                    | <i>dnaJ1</i>     | 0.4 | 0.1 | 0.5 | 0.2 |       | 0                   |

| Rv No.  | Description                                                           | Gene          | OD1 |     | OD2 |     | Q<br>PCR | (FDR 1%)<br>Q value |
|---------|-----------------------------------------------------------------------|---------------|-----|-----|-----|-----|----------|---------------------|
|         |                                                                       |               | Ave | SD  | Ave | SD  |          |                     |
| Rv3140  | Probable acyl-CoA dehydrogenase FadE23                                | <i>fadE23</i> | 0.4 | 0.1 | 0.6 | 0.0 |          | 0                   |
| Rv1631  | Dephospho-CoA kinase/unknown domain fusion protein                    | <i>coaE</i>   | 0.4 | 0.9 | 0.5 | 0.1 |          | 0                   |
| Rv0524  | Glutamate-1-semialdehyde aminotransferase                             | <i>hemL</i>   | 0.4 | 0.1 | 0.5 | 0.1 | X        | 0                   |
| Rv0351  | Probable GrpE protein (Hsp70 co-factor)                               | <i>grpE</i>   | 0.4 | 0.1 | 0.3 | 0.0 |          | 0                   |
| Rv2194  | Probable ubiquinol-cytochrome C reductase QcrC (cytochrome C subunit) | <i>qcrC</i>   | 0.4 | 0.1 | 0.5 | 0.0 |          | 0                   |
| Rv1850  | Urease alpha subunit UreC (Urea amidohydrolase)                       | <i>ureC</i>   | 0.4 | 0.0 | 0.6 | 0.1 |          | 0                   |
| Rv1303  | Hypothetical protein                                                  |               | 0.4 | 0.0 | 0.6 | 0.0 | X        | 0                   |
| Rv1537  | DNA polymerase IV                                                     | <i>dinX</i>   | 0.4 | 0.1 | 0.6 | 0.1 |          | 0                   |
| Rv2195  | Probable Rieske iron-sulfur protein QcrA                              | <i>qcrA</i>   | 0.4 | 0.1 | 0.4 | 0.1 |          | 0                   |
| Rv1770  | Hypothetical protein                                                  |               | 0.4 | 0.0 | 0.6 | 0.0 |          | 0                   |
| Rv1133c | 5-methyltetrahydropteroyltriglutamate--homocysteine methyltransferase | <i>metE</i>   | 0.5 | 0.0 | 0.3 | 0.0 |          | 0                   |
| Rv0982  | Probable two component sensor kinase MprB                             | <i>mprB</i>   | 0.5 | 0.1 | 0.6 | 0.1 |          | 0                   |
| Rv0368c | Hypothetical protein                                                  |               | 0.5 | 0.6 | 0.6 | 0.2 |          | 0                   |
| Rv0093c | Probable conserved membrane protein                                   |               | 0.5 | 0.3 | 0.6 | 0.0 |          | 0                   |
| Rv3264c | D-alpha-D-mannose-1-phosphate guanylyltransferase                     | <i>manB</i>   | 0.5 | 0.0 | 0.5 | 0.1 |          | 0                   |
| Rv2200c | Probable transmembrane cytochrome C oxidase (subunit II) CtaC         | <i>ctaC</i>   | 0.5 | 0.1 | 0.4 | 0.2 | X        | 0                   |
| Rv1596  | Nicotinate-nucleotide pyrophosphorylase                               | <i>nadC</i>   | 0.5 | 0.0 | 0.3 | 0.0 |          | 0                   |
| Rv1387  | PPE family protein                                                    | <i>PPE20</i>  | 0.5 | 0.1 | 0.5 | 0.1 |          | 0                   |
| Rv0280  | PPE family protein                                                    | <i>PPE3</i>   | 0.5 | 0.1 | 0.4 | 0.0 | X        | 0                   |
| Rv1779c | Hypothetical integral membrane protein                                |               | 0.5 | 0.2 | 0.6 | 0.1 | X        | 0                   |
| Rv3411c | Inositol-5-monophosphate dehydrogenase                                | <i>guaB2</i>  | 0.5 | 0.1 | 0.5 | 0.0 | X        | 0                   |
| Rv0157  | Probable NAD(P) transhydrogenase (subunit beta)                       | <i>pntB</i>   | 0.5 | 0.1 | 0.5 | 0.0 |          | 0                   |
| Rv2123  | PPE family protein                                                    | <i>PPE37</i>  | 0.5 | 0.2 | 0.5 | 0.1 | X        | 0                   |

**Supplementary Table S2. Primer Sequences.**

| <b>Primer Name</b>                                                   | <b>Primer Sequence (5' to 3')</b>                |
|----------------------------------------------------------------------|--------------------------------------------------|
| <b><u>INV RT PCR (<i>katG</i>)</u></b>                               |                                                  |
| INV katG1                                                            | GCCGACACGGAAACGATTTTC                            |
| INV katG2                                                            | ACGCCATCCGGATAAACAGC                             |
| INV RT katG1                                                         | CCCGTCGTGGGTCATATGAAA                            |
| INV RT katG2                                                         | TCAACGTCGATGGTTCGCGAC                            |
| <b><u>Deletion of promoter region</u></b>                            |                                                  |
| INV katG1                                                            | GCCGACACGGAAACGATTTTC                            |
| INV katG7                                                            | <b>GGAGTTGGTGTATCGGGCT</b> AGTGTCGGATATCGAACAAAT |
| katG RT                                                              | TCAACGTCGATGGTTCGCGAC                            |
| primer6                                                              | ATTACAGAAACCACCACCGG                             |
| primer5                                                              | CGGGTTTTGGTGCAGTACCTT                            |
| <b><u>INV RT PCR: Rv1186 (Negative control)</u></b>                  |                                                  |
| Rv1186-1                                                             | ATCCGCATGTTGTCCGATCC                             |
| Rv1186-2                                                             | ACTTGGATTGGCCGAGCATG                             |
| Rv1186-3                                                             | CTGCGCACCGAACTGGCCTC                             |
| Rv1186-4                                                             | GGTGGCGTTGGTCAGGGTGC                             |
| <b><u>Run off <i>in vitro</i> transcription - <i>katG</i></u></b>    |                                                  |
| INV katG1 F                                                          | GCCGACACGGAAACGATTTTC                            |
| INV KatG3 R                                                          | ACGGCCGGGTTTTGGTGCAG                             |
| <b><u>Knock out</u></b>                                              |                                                  |
| sigIKO1                                                              | ggcccatatgCATCGTCGAGCGCTCGCCGCTCACC              |
| sigIKO2                                                              | ggccactagtGTAGGCCCGATGCGCCCGCCAGGCC              |
| sigIKO3                                                              | ggcctaattaaGTGCAGCCTTCAACATTGGACCCGT             |
| sigIKO4                                                              | ggccctcagCCAATTTTCGGACGGGCAATAGCGAC              |
| <b><u>Complementing</u></b>                                          |                                                  |
| SigI comp 5                                                          | gggcctctagaTGCTTGACGAAGATCGCCAC                  |
| sigI comp 6                                                          | gggcctctagaAACACGTCACGCCAGACAAAG                 |
| pETsigI1                                                             | ggccCATATGATGTCGCAACACGACCCGGT                   |
| pETsigI2                                                             | ggccAAGCTTACCGCCGCCGAGTTCGGCCC                   |
| <b><u>pSCW-sigI (<i>sigI</i> overexpression in <i>M.tb.</i>)</u></b> |                                                  |
| pet1                                                                 | CGTAGAGGATCGAGATCTCGATCCCGCGA                    |
| pet2                                                                 | ggcctaattaaTCTCAGTGGTGGTGGTGGTG                  |
| <b><u>Southern blotting probe</u></b>                                |                                                  |
| STN-I-1                                                              | CAAGAGGCATTTTCCCGCTTG                            |

| <b>Primer Name</b>                                   | <b>Primer Sequence (5' to 3')</b> |
|------------------------------------------------------|-----------------------------------|
| STN-I-2                                              | TCGTGGCGATTTGCTGGTAG              |
| <b><u>Real-time RT-PCR (<i>sigI</i> regulon)</u></b> |                                   |
| Rv1908c-1(katG1)                                     | CTGTTTATCCGGATGGCGTG              |
| Rv1908c-2(katG2)                                     | GAAAACAATCAGGTCCGCCC              |
| Rv2123-1                                             | GACCCGACCAAATTGATCCTG             |
| Rv2123-2                                             | GCGAACGGTCCGAAATAGATC             |
| Rv3411-1                                             | CGCAACAAGATCGAGAAGCTG             |
| Rv3411-2                                             | AGCGTCGACCAACATCATGG              |
| Rv2280-1                                             | TTGACAACACTTCGATGGCCG             |
| Rv2280-2                                             | TGAGCATTTCACCCACCGTC              |
| Rv1303-1                                             | TGACGGTCGGGATGTTCTTG              |
| rv1303-2                                             | TGGTGATAATCGCCAGTCGC              |
| Rv0524-1                                             | TGGTTGGTACGGAATCGATCC             |
| Rv0524-2                                             | AACGTGCCGGCCTGATACAC              |
| Rv0826-1                                             | ACCTTCTTTGTCGGCACGTTG             |
| Rv0826-2                                             | TTGTTCTCCAGCACGTTGCG              |
| Rv1392-1                                             | AAGACGCTTGATCCCGACATC             |
| Rv1392-2                                             | TGTCGACGATGATCTTGCGG              |
| Rv1737-1                                             | TGGGGTCATGATCTCGCATC              |
| Rv1737-2                                             | ATGATGCCAAGGACCAAGCC              |
| Rv1253-1                                             | AGATGCTGACCATGGGTTTTCG            |
| Rv1253-2                                             | GCGGTTTTTCGCCTTACAAGTG            |
| Rv2193-1                                             | TGATCACATTCTGATGGGCC              |
| Rv2193-2                                             | AGCAGGAAGATGAAGGCGATG             |
| Rv2428-1                                             | GGCCGAAAGACTTCACGTTCTGTG          |
| Rv2428-2                                             | GCGCGAATTCGCTGTCAATCG             |
