# Supplementary material
Source: PubMed Central journal article supplement (PMC3648870)

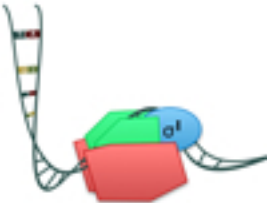

Supplement: NIHMS425493-supplement-1.pdf [file NIHMS425493-supplement-1.pdf]
